# Supplementary material for: Estrogen receptors orchestrate cell growth and differentiation to facilitate liver regeneration
Source: PubMed Central journal article supplement — Theranostics. 2018 Apr 9;8(10):2672–82. doi: 10.7150/thno.23624 (PMC5957001; doi:10.7150/thno.23624), 2018-04-09
Supplement: thnov08p2672s1.pdf [file thnov08p2672s1.pdf]

Suppl. Fig. 1, Kao *et al*

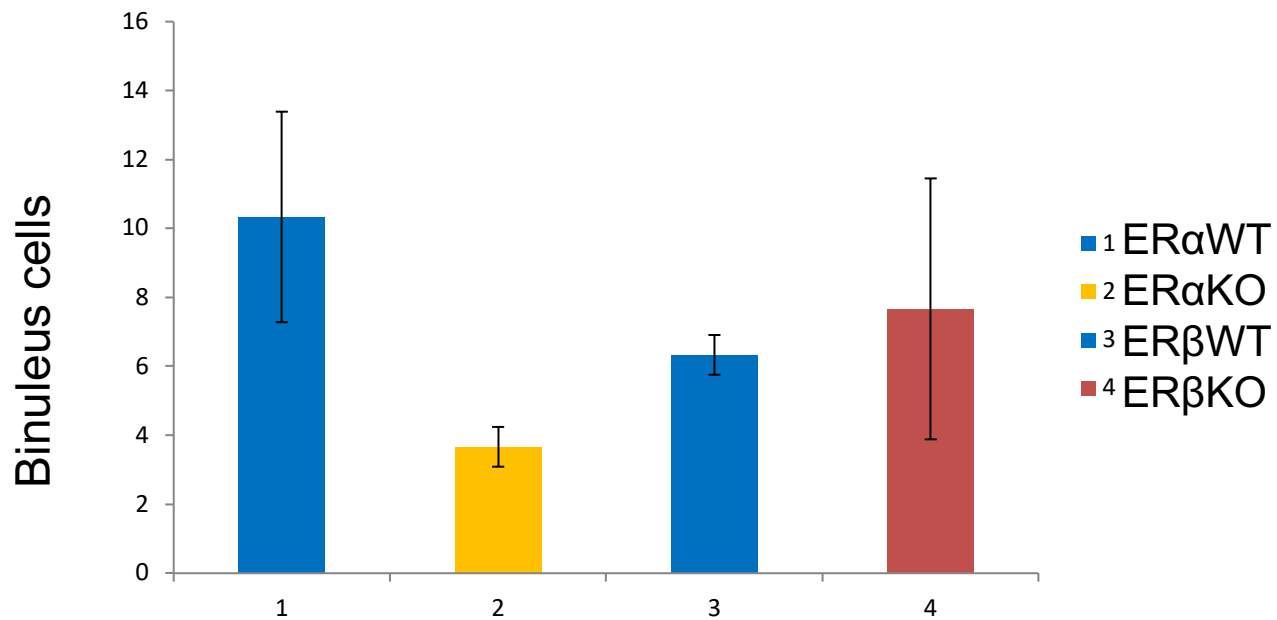

Supplemental Figure 1. The binucleated cell number count in regenerating livers (Post 2/3PHx surgery day 4) from WT vs. ER $\alpha$ -KO vs. ER $\beta$ -KO.

**Supplemental Table 1.** Genes and pathway enrichment analysis of ER $\alpha$  with KEGG platform

ER $\alpha$ KO vs Wildtype

KEGG pathway of PHx mice microarray

| Term                                             | Link                                                    | Count | %    | <i>P</i> Value | Genes                                                 |
|--------------------------------------------------|---------------------------------------------------------|-------|------|----------------|-------------------------------------------------------|
| mmu01040:Biosynthesis of unsaturated fatty acids | <a href="#">Biosynthesis of unsaturated fatty acids</a> | 5     | 0.75 | 0.003          | SCD1, 1600014K23RIK, SCD3, SCD2, ACOT3                |
| mmu04114:Oocyte meiosis                          | <a href="#">Oocyte meiosis</a>                          | 8     | 1.20 | 0.016          | CCNB1, ADCY3, CDK1, PLK1, RPS6KA2, BUB1, CDC20, AURKA |
| mmu04914:Progesterone-mediated oocyte maturation | <a href="#">Progesterone-mediated oocyte maturation</a> | 6     | 0.90 | 0.045          | CCNB1, ADCY3, CDK1, PLK1, RPS6KA2, BUB1               |
| mmu04540:Gap junction                            | <a href="#">Gap junction</a>                            | 6     | 0.90 | 0.047          | ADCY3, CDK1, TUBB2A-PS2, TUBB2A, TUBB6, TUBB3         |
| mmu00830:Retinol metabolism                      | <a href="#">Retinol metabolism</a>                      | 5     | 0.75 | 0.071          | CYP2C37, CYP26B1, CYP26A1, CYP2B10, CYP2A4            |
| mmu04115:p53 signaling pathway                   | <a href="#">p53 signaling pathway</a>                   | 5     | 0.75 | 0.074          | CCNB1, CDK1, CDKN1A, BAI1, GADD45A                    |
| mmu04110:Cell cycle                              | <a href="#">Cell cycle</a>                              | 7     | 1.05 | 0.074          | CCNB1, CDK1, CDKN1A, PLK1, BUB1, CDC20, GADD45A       |

**Supplemental Table 2.** Genes and pathway enrichment analysis of ERbeta with KEGG platform

ERβKO vs Wildtype

KEGG pathway of PHx mice microarray

| Term                                                  | Link                                                         | Count | %    | P Value  | Genes                                                                                                                                                                                                                                                                                                               |
|-------------------------------------------------------|--------------------------------------------------------------|-------|------|----------|---------------------------------------------------------------------------------------------------------------------------------------------------------------------------------------------------------------------------------------------------------------------------------------------------------------------|
| mmu00590:Arachidonic acid metabolism                  | <a href="#">Arachidonic acid metabolism</a>                  | 11    | 1.95 | 1.61E-05 | CYP2C37, CYP2C54, CYP2B13, GGT1, CYP2C50, CYP4A10, ALOX15, CYP4A32, CYP4A31, CYP2C38, CYP4A14, PLA2G2E, CYP2C39                                                                                                                                                                                                     |
| mmu03320:PPAR signaling pathway                       | <a href="#">PPAR signaling pathway</a>                       | 9     | 1.59 | 3.98E-04 | CYP4A10, SCD3, SCD2, CYP4A32, CYP4A31, FABP3, UCP1, CYP4A14, CYP8B1, ADIPOQ, ACSL6                                                                                                                                                                                                                                  |
| mmu00830:Retinol metabolism                           | <a href="#">Retinol metabolism</a>                           | 8     | 1.42 | 8.38E-04 | CYP4A10, CYP2C37, CYP2C54, CYP4A32, CYP4A31, CYP2B13, CYP4A14, CYP2C38, CYP2C39, CYP2C50                                                                                                                                                                                                                            |
| mmu00591:Linoleic acid metabolism                     | <a href="#">Linoleic acid metabolism</a>                     | 6     | 1.06 | 3.72E-03 | CYP2C37, CYP2C54, PLA2G2E, CYP2C38, CYP2C39, CYP                                                                                                                                                                                                                                                                    |
| mmu00980:Metabolism of xenobiotics by cytochrome P450 | <a href="#">Metabolism of xenobiotics by cytochrome P450</a> | 7     | 1.24 | 3.74E-03 | CYP2C37, CYP2C54, ALDH1A3, CYP2B13, CYP2C38, CYP2C39, CYP2C50                                                                                                                                                                                                                                                       |
| mmu00982:Drug metabolism                              | <a href="#">Drug metabolism</a>                              | 7     | 1.24 | 7.01E-03 | CYP2C37, CYP2C54, ALDH1A3, CYP2B13, CYP2C38, CYP2C39, CYP2C50                                                                                                                                                                                                                                                       |
| mmu04740:Olfactory transduction                       | <a href="#">Olfactory transduction</a>                       | 34    | 6.02 | 8.22E-03 | OLFR1370, OLFR315, OLFR611, OLFR805, OLFR823, OLFR690, OLFR1157, OLFR362, OLFR1506, OLFR945, OLFR1032, OLFR575, OLFR384, OLFR533, OLFR676, OLFR843, CAMK2A, OLFR899, OLFR874, OLFR282, OLFR954, OLFR441, OLFR716, GUCY2D, OLFR620, OLFR1145, OLFR665, OLFR608, OLFR584, OLFR644, OLFR1101, OLFR12, OLFR978, OLFR830 |
| mmu05320:Autoimmune thyroid disease                   | <a href="#">Autoimmune thyroid disease</a>                   | 5     | 0.88 | 8.15E-02 | IFNAB, CGA, IFNA5, H2-M1, H2-DMB2                                                                                                                                                                                                                                                                                   |

**ER $\alpha$  (6 mouse)**

|                  |                    |
|------------------|--------------------|
| V\$ER_Q6         | CAGGTCACTGTGACCTGA |
| V\$ER_Q6_02      | CAGGTCACGGT        |
| V\$ERALPHA_01    | AGGTCACAGTGACCT    |
| V\$ERALPHA_Q6_01 | TGACCTG            |
| V\$ERALPHA_Q6_02 | GGTCACGTGACCTG     |
| V\$ERALPHA_Q4    | GTCACCGTGACCT      |

**ER $\beta$  (3 mouse)**

|                 |                 |
|-----------------|-----------------|
| V\$ER_Q6_02     | CAGGTCACGGT     |
| V\$ERBETA_Q5    | GTCAGAGTGACCCAG |
| V\$ERBETA_Q5_01 | ACAGTGACCCGGAA  |

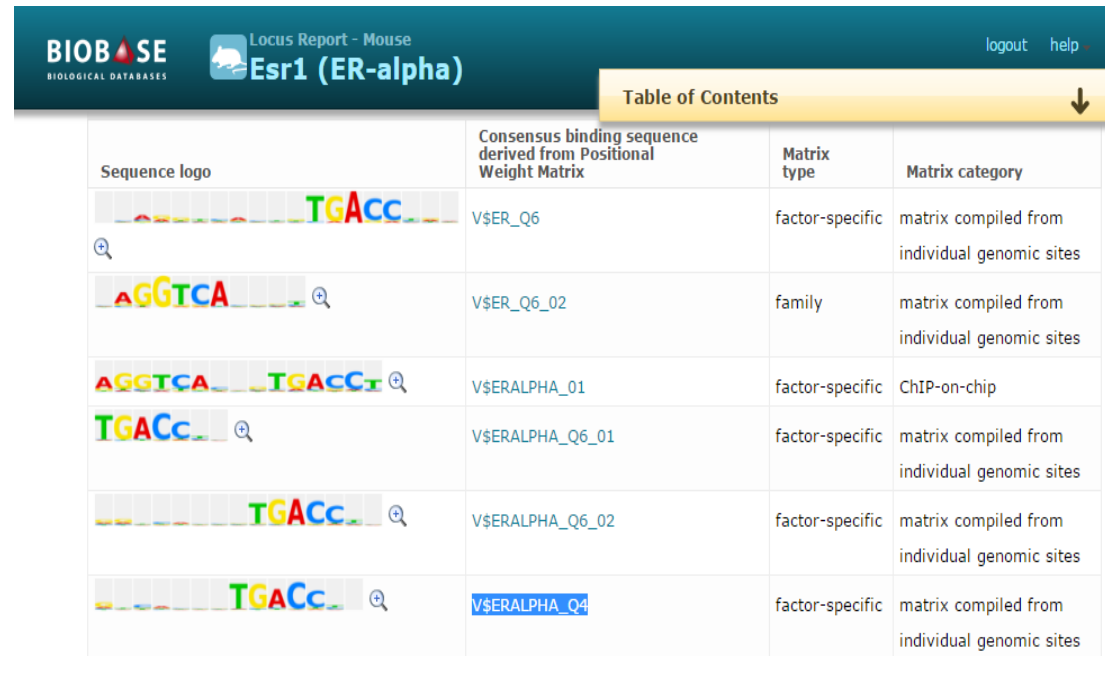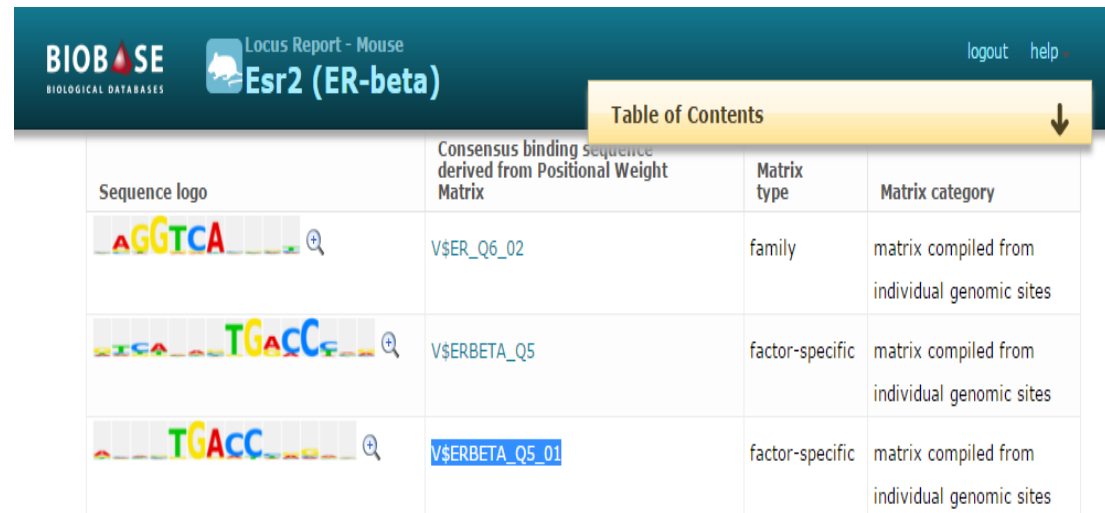

Supplemental Figure 2. The sequences and scores of ER $\alpha$ -EREs and ER $\beta$ -EREs.

**A**

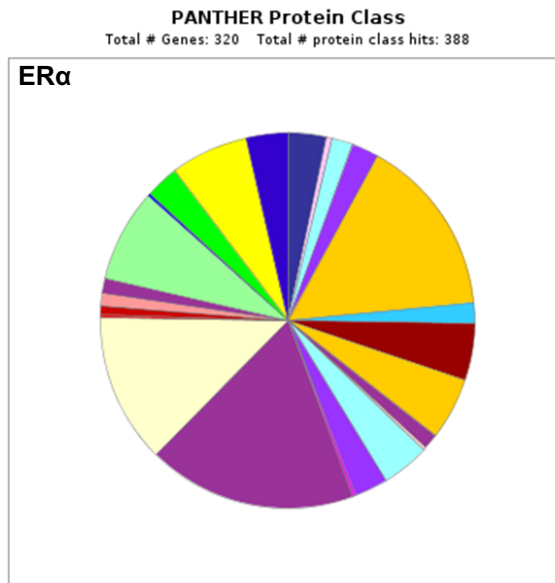

-  [calcium-binding protein \(PC00060\)](#)
-  [cell adhesion molecule \(PC00069\)](#)
-  [cell junction protein \(PC00070\)](#)
-  [chaperone \(PC00072\)](#)
-  [cytoskeletal protein \(PC00085\)](#)
-  [defense/immunity protein \(PC00090\)](#)
-  [enzyme modulator \(PC00095\)](#)
-  [hydrolase \(PC00121\)](#)
-  [isomerase \(PC00135\)](#)
-  [kinase \(PC00137\)](#)
-  [ligase \(PC00142\)](#)
-  [lyase \(PC00144\)](#)
-  [membrane traffic protein \(PC00150\)](#)
-  [nucleic acid binding \(PC00171\)](#)
-  [oxidoreductase \(PC00176\)](#)
-  [phosphatase \(PC00181\)](#)
-  [protease \(PC00190\)](#)
-  [receptor \(PC00197\)](#)
-  [signaling molecule \(PC00207\)](#)
-  [structural protein \(PC00211\)](#)
-  [transcription factor \(PC00218\)](#)
-  [transfer/carrier protein \(PC00219\)](#)
-  [transferase \(PC00220\)](#)
-  [transporter \(PC00227\)](#)

**B**

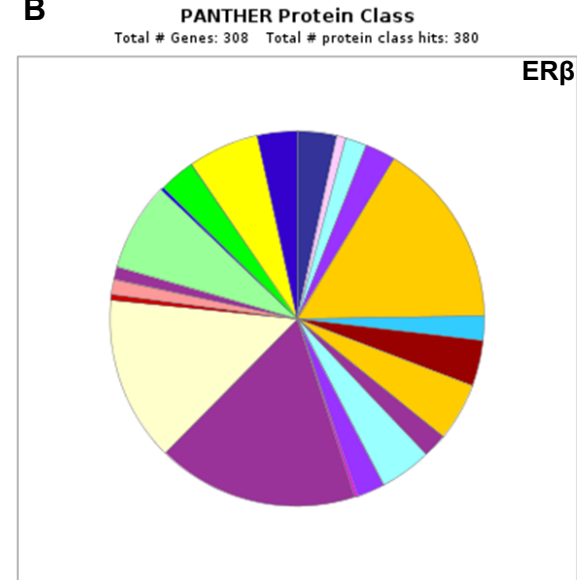

-  [calcium-binding protein \(PC00060\)](#)
-  [cell adhesion molecule \(PC00069\)](#)
-  [cell junction protein \(PC00070\)](#)
-  [chaperone \(PC00072\)](#)
-  [cytoskeletal protein \(PC00085\)](#)
-  [defense/immunity protein \(PC00090\)](#)
-  [enzyme modulator \(PC00095\)](#)
-  [hydrolase \(PC00121\)](#)
-  [isomerase \(PC00135\)](#)
-  [kinase \(PC00137\)](#)
-  [ligase \(PC00142\)](#)
-  [lyase \(PC00144\)](#)
-  [membrane traffic protein \(PC00150\)](#)
-  [nucleic acid binding \(PC00171\)](#)
-  [oxidoreductase \(PC00176\)](#)
-  [protease \(PC00190\)](#)
-  [receptor \(PC00197\)](#)
-  [signaling molecule \(PC00207\)](#)
-  [structural protein \(PC00211\)](#)
-  [transcription factor \(PC00218\)](#)
-  [transfer/carrier protein \(PC00219\)](#)
-  [transferase \(PC00220\)](#)
-  [transporter \(PC00227\)](#)

Supplemental Figure 3. The ER $\alpha$ - and ER $\beta$ -interactome enrichment analysis with the GSEA platform.
